# Supplementary material for: Multiple and Periodic Measurement of RBC Aggregation and ESR in Parallel Microfluidic Channels under On-Off Blood Flow Control
Source: MDPI journal article supplement (doi:10.3390/mi9070318), 2018-06-24
Supplement: s1 [file s1]

Article

# Multiple and Periodic Measurement of RBC Aggregation and ESR in Parallel Microfluidic Channels under On-Off Blood Flow Control

Yang Jun Kang <sup>1,\*</sup> and Byung Jun Kim <sup>2</sup>

<sup>1</sup> Department of Mechanical Engineering, Chosun University, 309 Pilmun-daero, Dong-gu, Gwangju 61452, Korea

<sup>2</sup> Department of Biomedical Science and Engineering, Gwangju Institute of Science and Technology (GIST), Gwangju 61005, Korea; gene392@gist.ac.kr

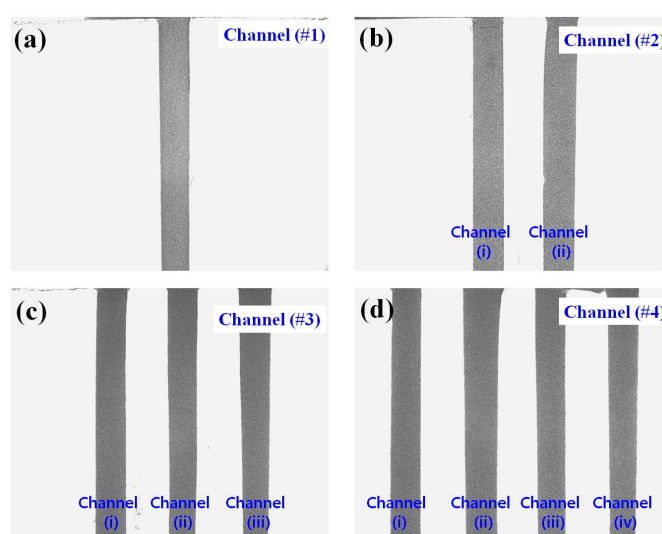

**Figure. S1** Microscopic images for showing a microfluidic device with parallel microfluidic channel ( $n$ ) [(a)  $n=1$ , (b)  $n=2$ , (c)  $n=3$ , and (d)  $n=4$ ].
